# Supplementary material for: CircRNA_30032 promotes renal fibrosis in UUO model mice via miRNA-96-5p/HBEGF/KRAS axis
Source: publisher site journal article supplement (doi:10.18632/aging.202947), 2021-05-11
Supplement: Supplementary file [file aging-v13i9-202947-supplementary-material-SD1.pdf]

## SUPPLEMENTARY DATA

### The sequences of circRNA\_30032

mmu\_circRNA\_30032

AAAAGACGAGGCGAAGTGGTTAAAAGTGCCTG  
AATGTCAACATACTACAACGACCAAGTG  
TGAATTCTCTTTACTGGACACAAATGTGTATAT  
CAAAACACAGTTTCGTGTCAGAGCAGA  
GGAAGGGAACAGCACATCTTCGTGGAATGAGG  
TTGATCCGTTTATTCCATTCTACACAGC  
TCACATGAGCCCCCAGAAGTACGTTTAGAAGC  
TGAAGATAAAGCCATACTAGTCCACAT

CTCtctcccgacaagacgggaacatgtgggcactggagaaACCTT  
CCTTCAGTTACAC  
CATACGAATCTGGCAGAAGTCTTCCAGTGACAA  
AAAAACTATTA ACTCTACGTATTATGT  
AGAAAAGATACCAGA ACTCTTGCCAGAGACTA  
CTTACTGTTTAGAAGTTAAAGCAATACA  
TCCGTC ACTTAAGAAACACAGCAATTACAGCAC  
TGTGCAGTGTATAAGCACCACAGTGGC  
AAATAAAATGCCTGTGCCAGGAAATCTCCAAG  
TGGATGCCCAAGGCAAGAGCTATGTCCT  
GAAATGGGACTACATTGCGTCTGCAGACGTGCT  
CTTCAGGGCACAGTGGCTTCC.
